# Supplementary material for: A D–A–D-type di-lophine derivative-based photoactive metal–organic framework: fluorescence sensing of UO22+ and photochromic behavior
Source: Royal Society of Chemistry journal article supplement (doi:10.1039/d4qi01105h), 2024-01-01
Supplement: d4qi01105h1.pdf [file d4qi01105h1.pdf]

## **D-A-D-type Bilophine Derivative-Based Photoactive Metal-Organic Framework: Fluorescence Sensing of $\text{UO}_2^{2+}$ and Photochromic Behavior**

Yu-jian Cheng<sup>a</sup>, Zi-tong Chen<sup>a,\*</sup>, Hao-ran Ji<sup>a</sup>, Yuan Chen<sup>a,\*</sup>, Bao Li<sup>a, b\*</sup>

<sup>a</sup> Key Laboratory of Material Chemistry for Energy Conversion and Storage, Semiconductor chemistry center, School of Chemistry and Chemical Engineering, Hubei Key Laboratory of Bioinorganic Chemistry & Materia Medica, Huazhong University of Science and Technology, Wuhan, Hubei, 430074, People's Republic of China. Email: [chenzncu0514@163.com](mailto:chenzncu0514@163.com), [chenyuan122800@163.com](mailto:chenyuan122800@163.com), [libao@hust.edu.cn](mailto:libao@hust.edu.cn).

<sup>b</sup>Jiangxi Provincial Key Laboratory of Functional Crystalline Materials Chemistry, Jiangxi University of Science and Technology, Ganzhou 341000, Jiangxi Province, P.R. China.

### **Luminescence detection of different anions.**

Then, the potential of Cd-MOF as a luminescence sensor for the detection of inorganic anions, including Cl<sup>-</sup>, Br<sup>-</sup>, I<sup>-</sup>, NO<sub>2</sub><sup>-</sup>, SCN<sup>-</sup>, SO<sub>4</sub><sup>2-</sup>, IO<sub>3</sub><sup>-</sup>, CrO<sub>4</sub><sup>2-</sup>, Cr<sub>2</sub>O<sub>7</sub><sup>2-</sup> and MnO<sub>4</sub><sup>-</sup> was explored. As shown in Fig. S4, the composite system containing CrO<sub>4</sub><sup>2-</sup>, Cr<sub>2</sub>O<sub>7</sub><sup>2-</sup> and MnO<sub>4</sub><sup>-</sup> exhibited a strong fluorescence quenching effect with quenching efficiencies of 96, 100, and 100%, respectively. The results of competition experiments showed that the fluorescence quenching efficiency of Cd-MOF was almost unaffected in CrO<sub>4</sub><sup>2-</sup>, Cr<sub>2</sub>O<sub>7</sub><sup>2-</sup> and MnO<sub>4</sub><sup>-</sup> solutions containing other anions (Fig. S8). According to the S-V curves, as shown in Fig. S17, CrO<sub>4</sub><sup>2-</sup> and MnO<sub>4</sub><sup>-</sup> showed good linearity over the whole concentration range of 0-14 μM and 0-8 μM and lower detection concentration intervals, respectively.  $K_{sv}$  values of  $2.4 \times 10^4$  and  $7.1 \times 10^4$  M<sup>-1</sup>, the S-V curves of Cr<sub>2</sub>O<sub>7</sub><sup>2-</sup> showed good linearity in the concentration range of 0-60 μM, and the fluorescence quenching constant,  $K_{sv}$ , was  $1.7 \times 10^4$  M<sup>-1</sup>, which indicated that the effect of Cd-MOF on CrO<sub>4</sub><sup>2-</sup>, Cr<sub>2</sub>O<sub>7</sub><sup>2-</sup> and MnO<sub>4</sub><sup>-</sup> with good detection performance.

### **Luminescent detection of antibiotics.**

The widespread use of antibiotics has contributed to the development of sensors for the detection of antibiotic residues in the environment. The effectiveness of Cd-MOF in antibiotic detection was also tried. Nine antibiotics, including sulfadiazine (SDZ), sulfamethoxazole (SMZ), sulfamethoxazole (SMT), sulfamethoxazole (TAP), enrofloxacin (ENR), norfloxacin (NOR), furazolidone (FZD), furazanidazole (NFZ), and tetracycline (TC), were selected as analytes.<sup>1, 2</sup> The Cd-MOF was tested for the detection of antibiotic residues in the environment at the same excitation wavelength at room temperature ( $\lambda_{ex} = 360$  nm), the fluorescence spectra of Cd-MOF in different antibiotic solutions were tested.

SDZ, SMZ, SMT, and TAP had fluorescence intensity enhancement effects on Cd-MOF, and the remaining antibiotics ENR, NOR, FZD, NFZ, and TC had different degrees of quenching effects on the fluorescence intensity of Cd-MFO (Fig. S5). The order of the quenching efficiency from high to low was TC > NFZ > FZD > NOR > ENR, all of which could achieve a quenching efficiency of more than 80%.

### **Luminescent detection of nitro explosives.**

Nitroaromatic compounds are important synthetic raw materials in industry, as well as in pharmaceuticals and dyes.<sup>3, 4</sup> Exposure of nitroaromatic compounds, such as nitrobenzene (NB) and 2,4,6-trinitrophenol (TNP), to the environment can result in serious environmental pollution. Therefore, the feasibility of Cd-MOF for the detection of nitro explosives including nitrobenzene (NB), 1,3-dinitrobenzene (1,3-DNB), 1,4-dinitrobenzene (1,4-DNB), 2,4-dinitrotoluene (2,4-DNT), 4-nitrophenol (4-NP), 2-nitrotoluene (2-NT), and 2,4,6-trinitrophenol (TNP). The fluorescence intensity reduction of Cd-MOF by generic nitroaromatic explosives was different (Fig. S6). The most significant quenching effect was 4-NP, followed by TNP, while the rest of the nitroaromatic explosives showed relatively weak quenching effects.

**Table S1. Crystal data and structure refinement for Cd-MOF.**

| Identification code                            | Cd-MOF                                                                 |
|------------------------------------------------|------------------------------------------------------------------------|
| Empirical formula                              | C <sub>40</sub> H <sub>22</sub> N <sub>4</sub> O <sub>8</sub> Cd       |
| Formula weight                                 | 799.03                                                                 |
| Temperature/K                                  | 273.15                                                                 |
| Crystal system                                 | monoclinic                                                             |
| Space group                                    | C2/c                                                                   |
| <i>a</i> /Å                                    | 20.0697(7)                                                             |
| <i>b</i> /Å                                    | 18.6744(6)                                                             |
| <i>c</i> /Å                                    | 13.6622(4)                                                             |
| $\alpha$ /°                                    | 90                                                                     |
| $\beta$ /°                                     | 103.4630(10)                                                           |
| $\gamma$ /°                                    | 90                                                                     |
| Volume/Å <sup>3</sup>                          | 4979.7(3)                                                              |
| Z                                              | 4                                                                      |
| $\rho_{\text{calc}}$ /g/cm <sup>3</sup>        | 1.063                                                                  |
| $\mu$ /mm <sup>-1</sup>                        | 0.481                                                                  |
| F(000)                                         | 1600.0                                                                 |
| Radiation                                      | MoK $\alpha$ ( $\lambda$ = 0.71073)                                    |
| 2 $\theta$ range for data collection/°         | 3.018 to 46.542                                                        |
| Index ranges                                   | -22 $\leq$ h $\leq$ 22, -20 $\leq$ k $\leq$ 20, -15 $\leq$ l $\leq$ 15 |
| Reflections collected                          | 19707                                                                  |
| Independent reflections                        | 3463 [ $R_{\text{int}}$ = 0.0612, $R_{\text{sigma}}$ = 0.0414]         |
| Data/restraints/parameters                     | 3463/0/240                                                             |
| Goodness-of-fit on F <sup>2</sup>              | 1.126                                                                  |
| Final <i>R</i> indexes [ $I \geq 2\sigma(I)$ ] | $R_1$ = 0.0616, $wR_2$ = 0.1868                                        |
| Final <i>R</i> indexes [all data]              | $R_1$ = 0.0644, $wR_2$ = 0.1971                                        |

**Table S2. Bond Lengths for Cd-MOF.**

| Atom | Atom            | Length/Å | Atom | Atom             | Length/Å  |
|------|-----------------|----------|------|------------------|-----------|
| Cd1  | O4 <sup>1</sup> | 2.454(4) | C13  | C14              | 1.457(8)  |
| Cd1  | O4 <sup>2</sup> | 2.454(4) | C12  | C11              | 1.479(8)  |
| Cd1  | O1              | 2.244(4) | C15  | C16              | 1.387(8)  |
| Cd1  | O1 <sup>3</sup> | 2.244(4) | C15  | C14              | 1.393(8)  |
| Cd1  | O3 <sup>2</sup> | 2.321(5) | O2   | C20              | 1.217(9)  |
| Cd1  | O3 <sup>1</sup> | 2.321(5) | C19  | C16              | 1.382(9)  |
| Cd1  | C1 <sup>2</sup> | 2.733(6) | C19  | C20              | 1.505(9)  |
| Cd1  | C1 <sup>1</sup> | 2.733(6) | C19  | C18              | 1.388(10) |
| O4   | C1              | 1.252(7) | C11  | C9               | 1.373(9)  |
| O1   | C20             | 1.242(9) | C11  | C10              | 1.361(9)  |
| N1   | C8              | 1.386(8) | C6   | C5               | 1.401(9)  |
| N1   | C12             | 1.366(8) | C5   | C2               | 1.376(10) |
| N2   | C13             | 1.395(8) | C4   | C3               | 1.387(9)  |
| N2   | C12             | 1.309(8) | C2   | C1               | 1.502(9)  |
| O3   | C1              | 1.229(8) | C2   | C3               | 1.374(10) |
| C8   | C7              | 1.468(8) | C14  | C17              | 1.395(9)  |
| C8   | C13             | 1.387(9) | C9   | C10 <sup>4</sup> | 1.422(9)  |
| C7   | C6              | 1.372(9) | C18  | C17              | 1.375(9)  |
| C7   | C4              | 1.390(9) |      |                  |           |

<sup>1</sup>-1/2+X,-1/2+Y,+Z; <sup>2</sup>3/2-X,-1/2+Y,3/2-Z; <sup>3</sup>1-X,+Y,3/2-Z; <sup>4</sup>3/2-X,1/2-Y,-Z

**Table S3. Bond Angles for Cd-MOF.**

| Atom            | Atom | Atom            | Angle/°    | Atom            | Atom | Atom             | Angle/°   |
|-----------------|------|-----------------|------------|-----------------|------|------------------|-----------|
| O4 <sup>1</sup> | Cd1  | O4 <sup>2</sup> | 123.9(2)   | O3 <sup>1</sup> | Cd1  | O4 <sup>1</sup>  | 53.82(15) |
| O4 <sup>2</sup> | Cd1  | C1 <sup>2</sup> | 27.26(16)  | O3 <sup>1</sup> | Cd1  | O3 <sup>2</sup>  | 89.1(4)   |
| O4 <sup>2</sup> | Cd1  | C1 <sup>1</sup> | 105.83(18) | O3 <sup>1</sup> | Cd1  | C1 <sup>2</sup>  | 87.8(2)   |
| O4 <sup>1</sup> | Cd1  | C1 <sup>2</sup> | 105.83(18) | O3 <sup>2</sup> | Cd1  | C1 <sup>2</sup>  | 26.58(18) |
| O4 <sup>1</sup> | Cd1  | C1 <sup>1</sup> | 27.26(16)  | O3 <sup>1</sup> | Cd1  | C1 <sup>1</sup>  | 26.58(18) |
| O1              | Cd1  | O4 <sup>2</sup> | 81.15(15)  | O3 <sup>2</sup> | Cd1  | C1 <sup>1</sup>  | 87.8(2)   |
| O1 <sup>3</sup> | Cd1  | O4 <sup>2</sup> | 138.04(16) | C1 <sup>1</sup> | Cd1  | C1 <sup>2</sup>  | 98.2(3)   |
| O1              | Cd1  | O4 <sup>1</sup> | 138.04(16) | C1              | O4   | Cd1 <sup>4</sup> | 88.8(4)   |
| O1 <sup>3</sup> | Cd1  | O4 <sup>1</sup> | 81.15(15)  | C20             | O1   | Cd1              | 105.9(4)  |
| O1              | Cd1  | O1 <sup>3</sup> | 102.3(2)   | C1              | O3   | Cd1 <sup>4</sup> | 95.8(4)   |
| O1 <sup>3</sup> | Cd1  | O3 <sup>2</sup> | 102.50(18) | N1              | C8   | C7               | 120.2(5)  |
| O1              | Cd1  | O3 <sup>2</sup> | 132.61(19) | N1              | C8   | C13              | 105.5(5)  |
| O1 <sup>3</sup> | Cd1  | O3 <sup>1</sup> | 132.61(19) | O4              | C1   | Cd1 <sup>4</sup> | 63.9(3)   |
| O1              | Cd1  | O3 <sup>1</sup> | 102.50(18) | O4              | C1   | C2               | 119.2(6)  |
| O1 <sup>3</sup> | Cd1  | C1 <sup>2</sup> | 121.76(18) | O3              | C1   | Cd1 <sup>4</sup> | 57.7(3)   |
| O1 <sup>3</sup> | Cd1  | C1 <sup>1</sup> | 107.16(18) | O3              | C1   | O4               | 121.5(6)  |
| O1              | Cd1  | C1 <sup>2</sup> | 107.16(18) | O3              | C1   | C2               | 119.3(6)  |
| O1              | Cd1  | C1 <sup>1</sup> | 121.76(18) | C2              | C1   | Cd1 <sup>4</sup> | 175.1(5)  |
| O3 <sup>2</sup> | Cd1  | O4 <sup>2</sup> | 53.82(15)  | O1              | C20  | C19              | 118.5(6)  |
| O3 <sup>1</sup> | Cd1  | O4 <sup>2</sup> | 85.4(2)    | O2              | C20  | O1               | 121.8(7)  |
| O3 <sup>2</sup> | Cd1  | O4 <sup>1</sup> | 85.4(2)    | O2              | C20  | C19              | 119.7(7)  |

<sup>1</sup>-1/2+X,-1/2+Y,+Z; <sup>2</sup>3/2-X,-1/2+Y,3/2-Z; <sup>3</sup>1-X,+Y,3/2-Z; <sup>4</sup>1/2+X,1/2+Y,+Z; <sup>5</sup>3/2-X,1/2-Y,-Z

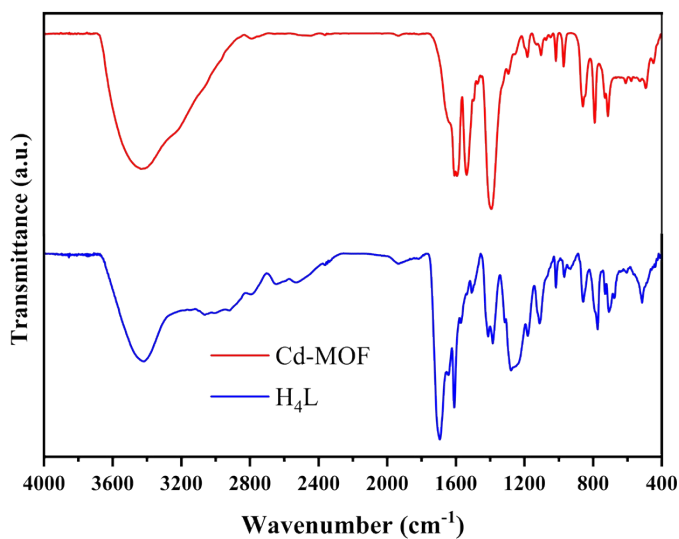

**Figure S1.** Infrared spectra of H<sub>4</sub>L and Cd-MOF.

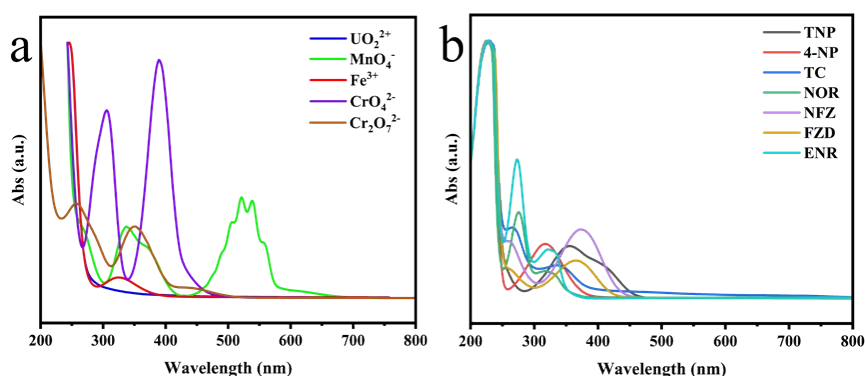

**Figure S2.** UV-visible absorption spectra of anions and cations undergoing fluorescence quenching (a), nitro explosives, and antibiotics (b).

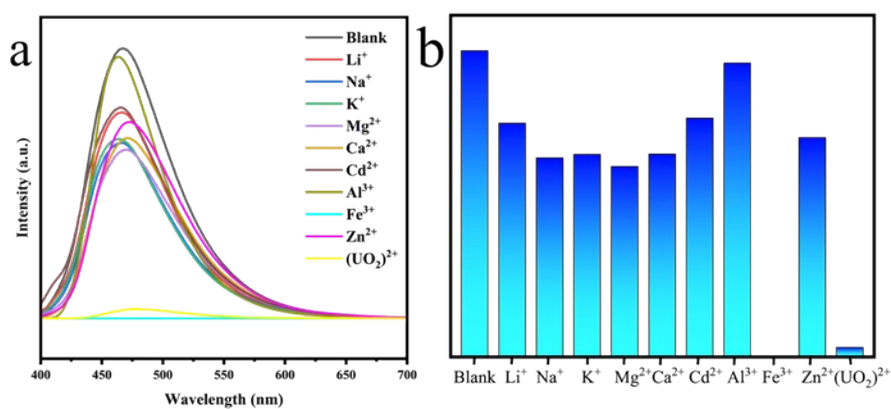

**Figure S3.** Cation quenching curves of Cd-MOF (a), and histogram of cation quenching percentage of cations (b).

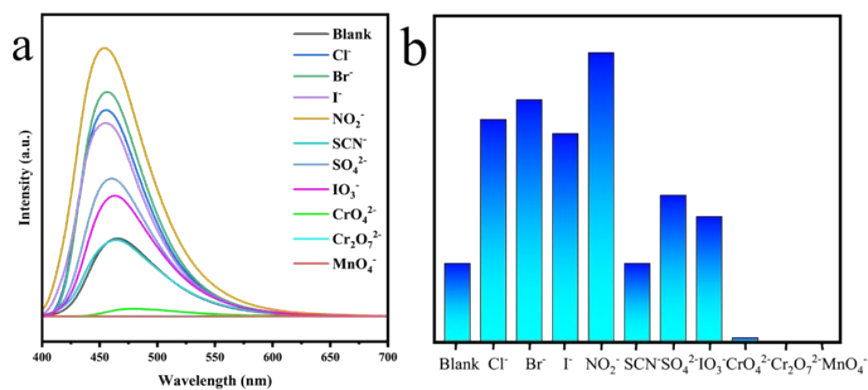

**Figure S4.** Anion quenching curve of Cd-MOF (a), and histogram of quenching percentage of anions (b).

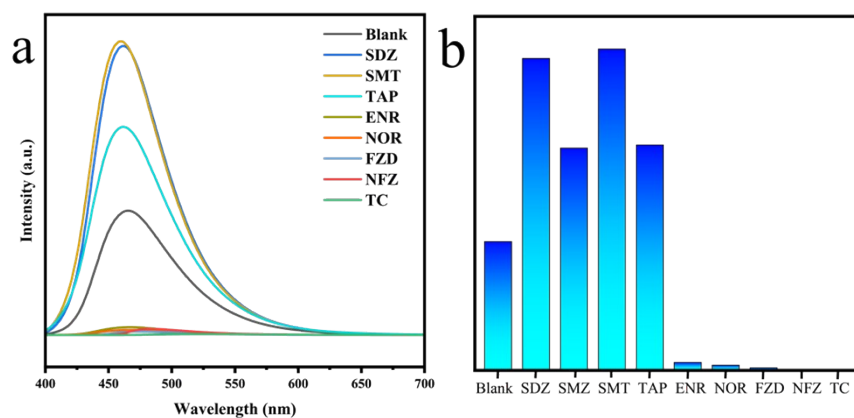

**Figure S5.** Antibiotic quenching curve of Cd-MOF (a), and histogram of percentage quenching of antibiotics (b).

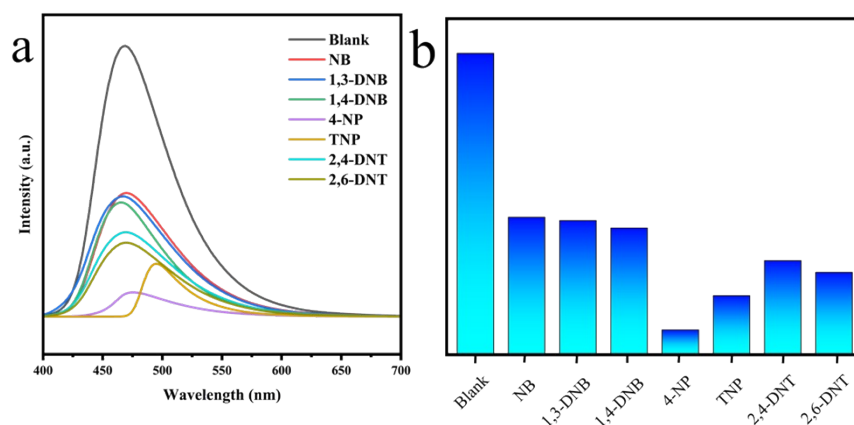

**Figure S6.** Nitro explosive quenching curve for Cd-MOF (a), and histogram of the percentage quenching of nitro explosives (b).



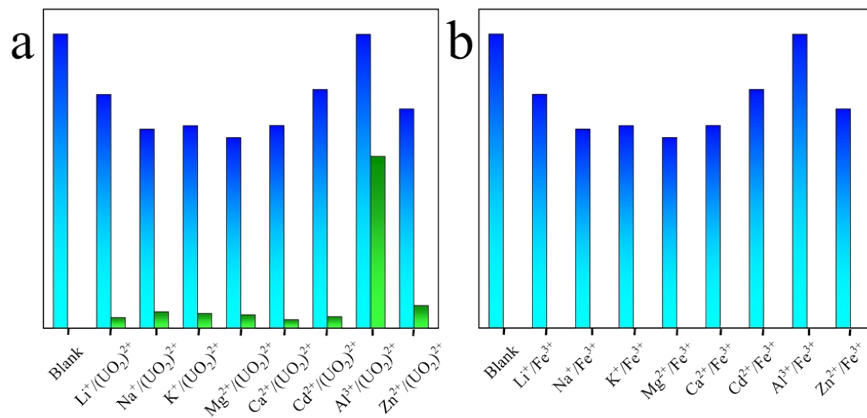

**Figure S7.** Histograms of fluorescence intensity of Cd-MOF for the detection of  $\text{UO}_2^{2+}$  (a) and  $\text{Fe}^{3+}$  (b) under different metal ion interferences.

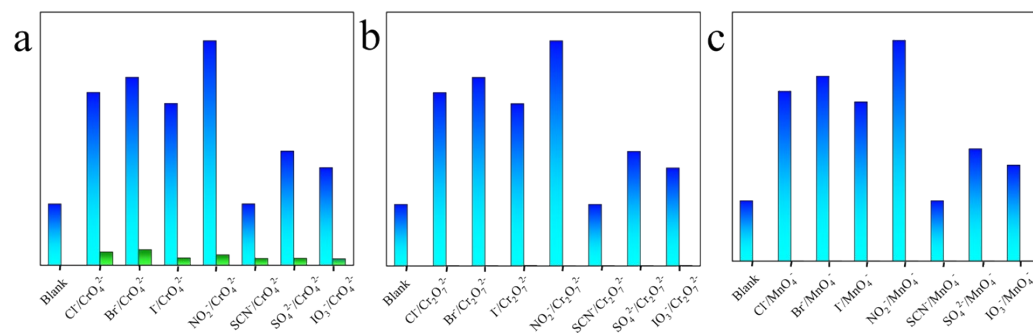

**Figure S8.** Histograms of fluorescence intensity of  $\text{CrO}_4^{2-}$  (a),  $\text{Cr}_2\text{O}_7^{2-}$  (b) and  $\text{MnO}_4^-$  (c) detected by Cd-MOF under different anionic interferences.

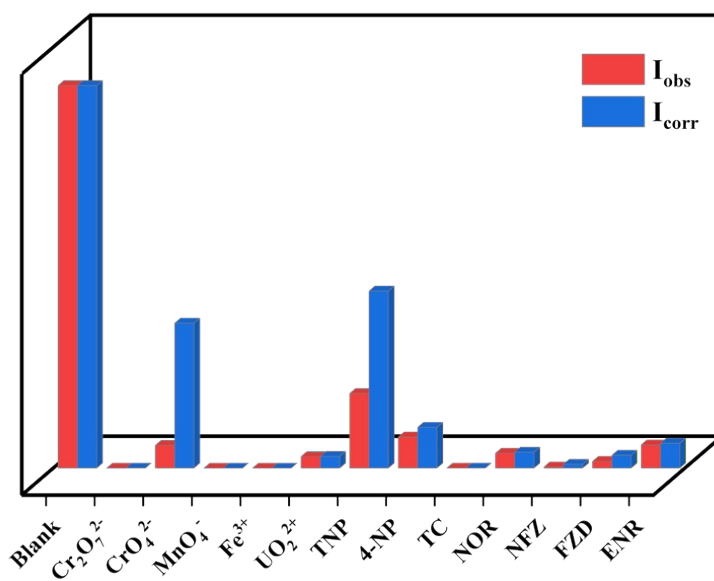

**Figure S9.** Comparison of fluorescence quenching intensity before and after correction for internal filtering effect.

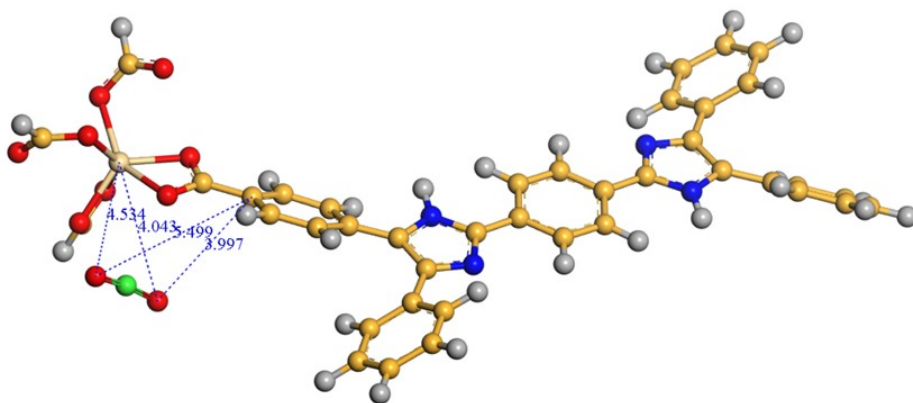

**Figure S10.** Distance between  $\text{UO}_2^{2+}$  and Cd-MOF.

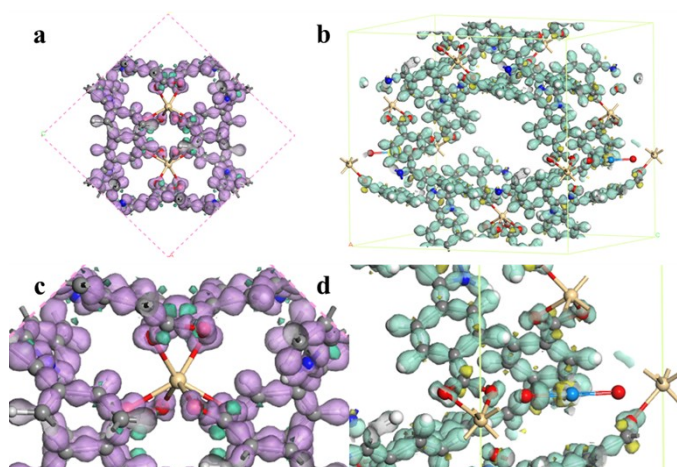

**Figure S11.** Differential electron density plots and zoomed-in plots for Cd-MOF (a, c) and  $\text{UO}_2^{2+}$ @Cd-MOF (b, d), respectively.

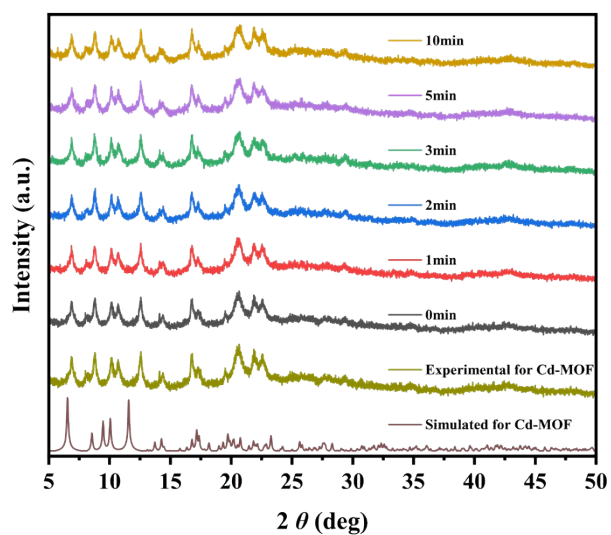

**Figure S12.** The XRD diffraction of Cd-MOF under irradiation.

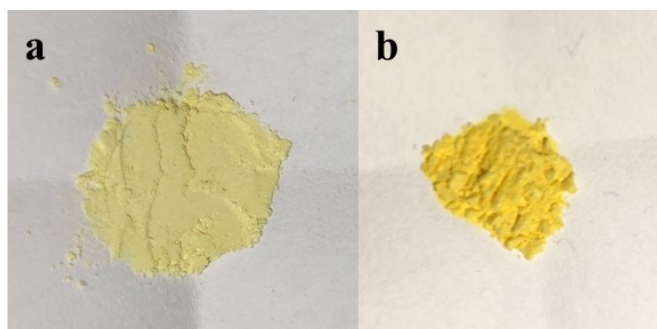

**Figure S13.** Optical photos of (a) Cd-MOF and (b) UO<sub>2</sub><sup>2+</sup>@Cd-MOF.

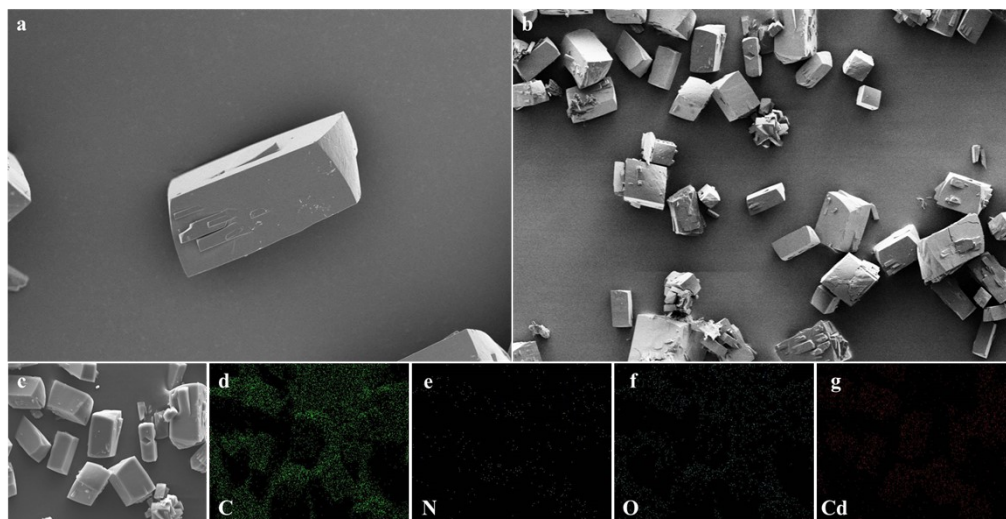

**Figure S14.** (a, b) SEM images of Cd-MOF. (c-g) EDS mapping images of Cd-MOF.

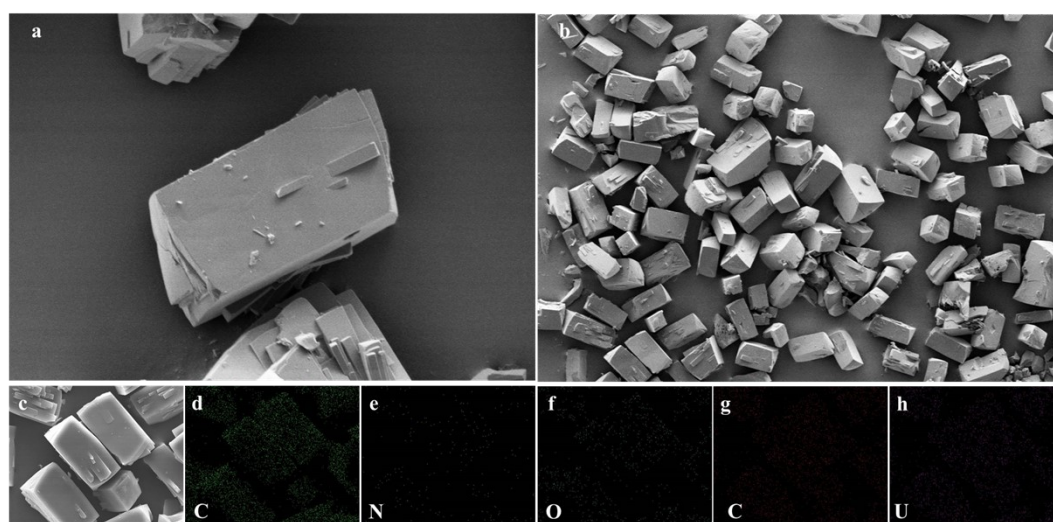

**Figure S15.** (a, b) SEM images of UO<sub>2</sub><sup>2+</sup>@Cd-MOF. (c-h) EDS mapping image of UO<sub>2</sub><sup>2+</sup>@Cd-MOF.

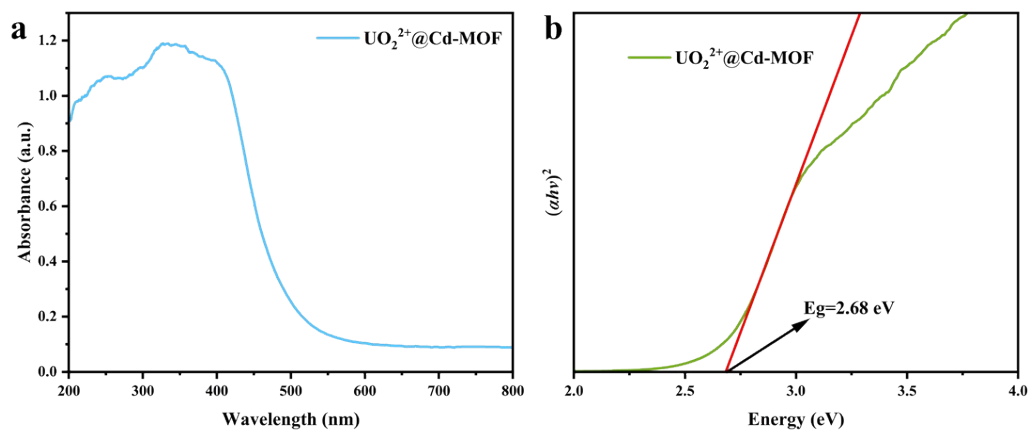

**Figure S16.** (a) UV-visible diffuse reflectance spectra and (b) the corresponding Tauc plot of  $\text{UO}_2^{2+}@Cd\text{-MOF}$ .

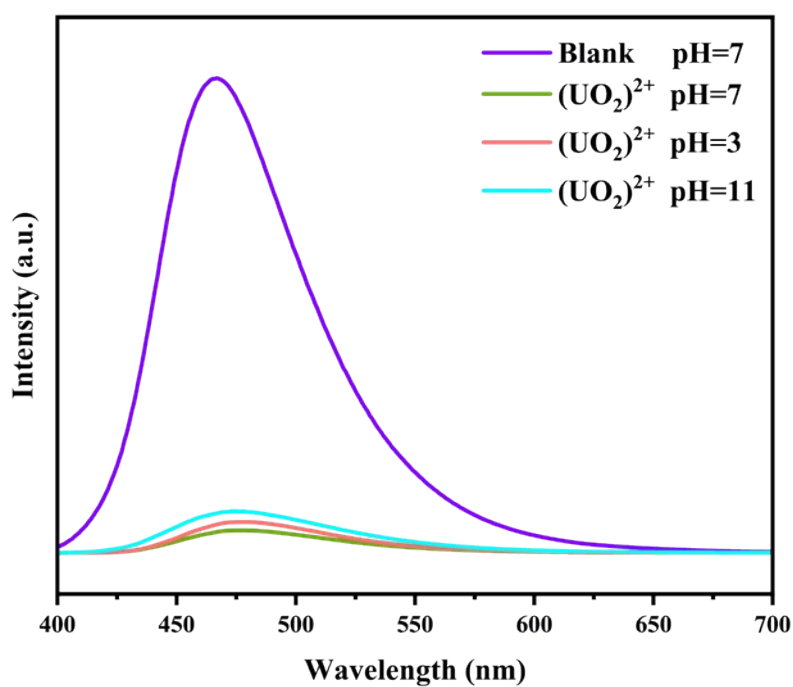

**Figure S16.** Fluorescence quenching curves of Cd-MOF in simulated seawater at different pH conditions.

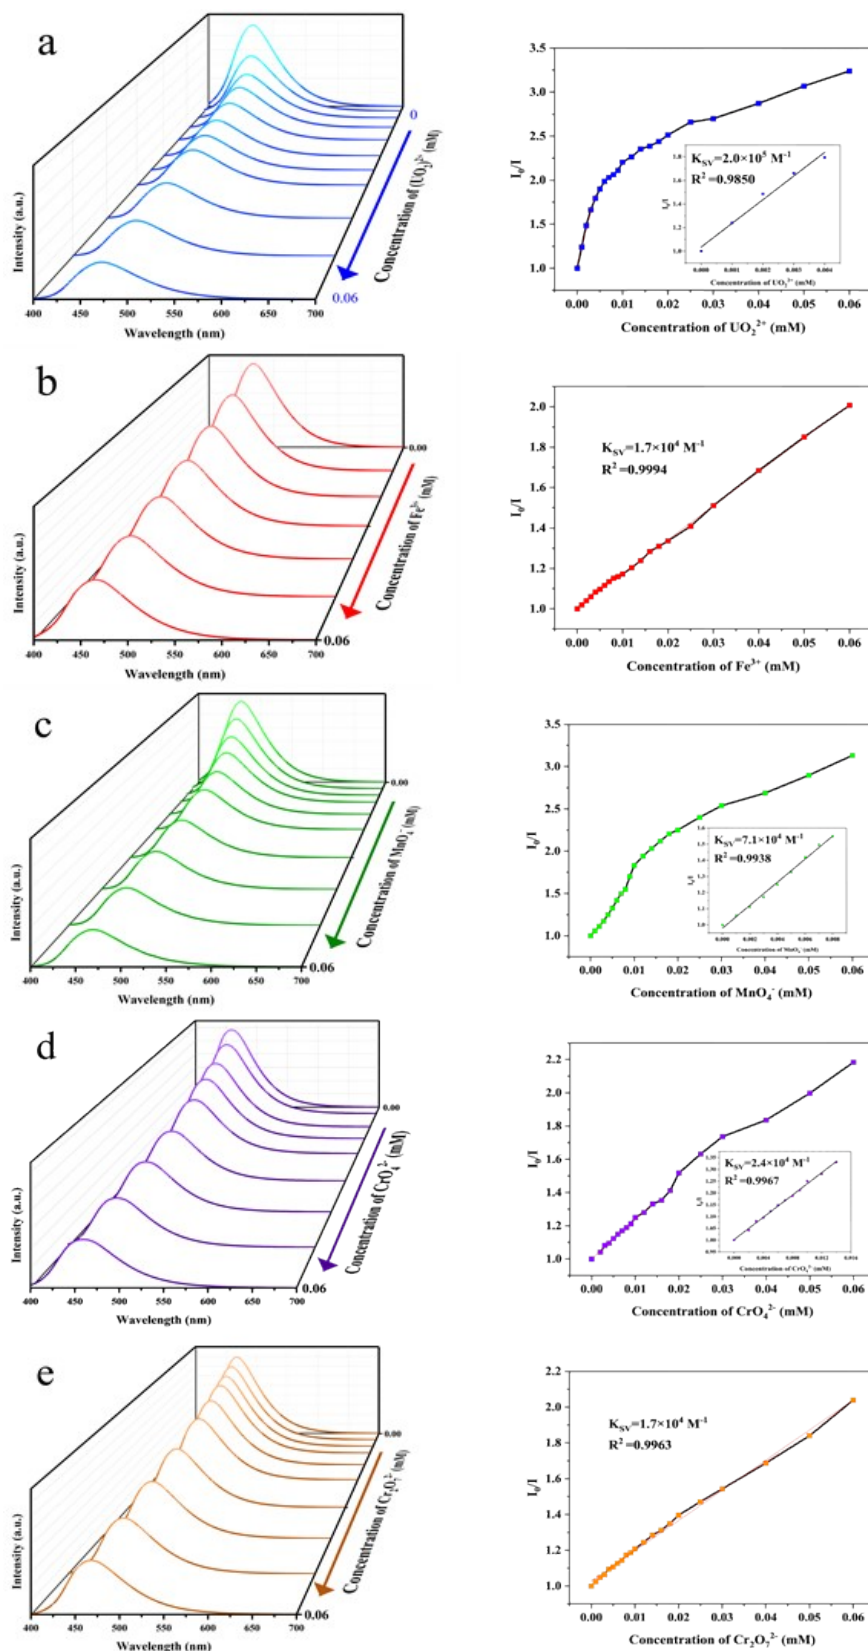

**Figure S17.** Fluorescence spectra of Cd-MOF in solutions of (a)  $\text{UO}_2^{2+}$ , (b)  $\text{Fe}^{3+}$ , (c)  $\text{MnO}_4^-$ , (d)  $\text{CrO}_4^{2-}$  and (e)  $\text{Cr}_2\text{O}_7^{2-}$  at different concentrations and the corresponding linearity.

## References

1. L. Lan Men, J. Li, M. Yue Fan, X. Li, Y. Ling Liu, F. Wei Gao and Z. Min Su, Anthracene-Modified Cadmium Metal-Organic Framework as an Excellent Sensor for the Detection of 2,4,6-Trinitrophenol and Nitrofurantoin, *Eur. J. Inorg. Chem.*, 2022, **2022**, e202100999.
2. Y.-L. Zhao, Q. Chen, J. Lv, M.-M. Xu, X. Zhang and J.-R. Li, Specific sensing of antibiotics with metal-organic frameworks based dual sensor system, *Nano Res.*, 2022, **15**, 6430-6437.
3. J.-L. Li, Y. Xiao, L.-Y. Wang, Y.-H. Xing, F.-Y. Bai and Z. Shi, Oriented construction of the Mixed-metal organic framework with triazine hexacarboxylic acid and fluorescence detection:  $\text{Fe}^{3+}$ ,  $\text{Cr}_2\text{O}_7^{2-}$  and TNP, *Polyhedron*, 2022, **214**, 115648.
4. S. A. A. Razavi, A. Morsali and M. Piroozzadeh, A Dihydropyridazine-Functionalized Metal-Organic Framework as a Highly Selective Luminescent Host-Guest Sensor for Detection of 2,4,6-Trinitrophenol, *Inorg. Chem.*, 2022, **61**, 7820-7834.
